# Supplementary material
Source: PubMed Central journal article supplement (PMC1765461)

### Control – Single exponential

$\tau = 2.1$  ms

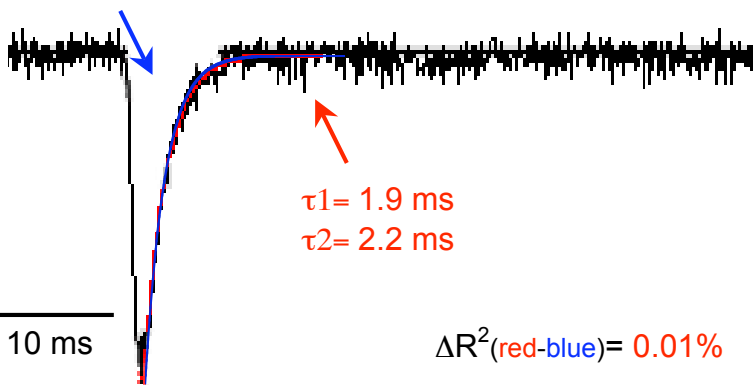

### Experimental – Single exponential

$\tau = 1.7$  ms

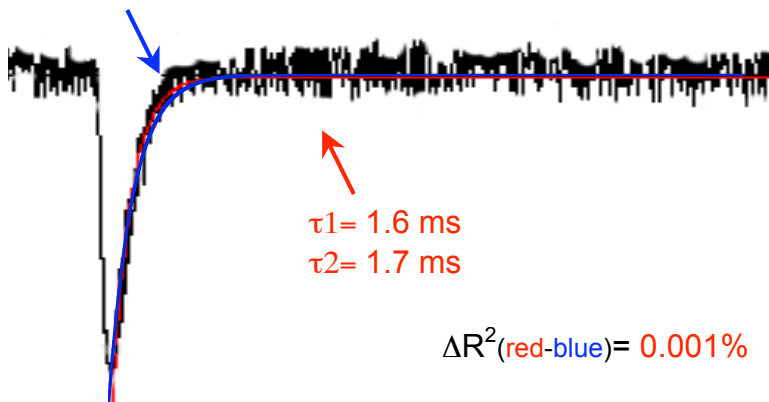

### Experimental – Two exponentials

$\tau = 3.8$  ms

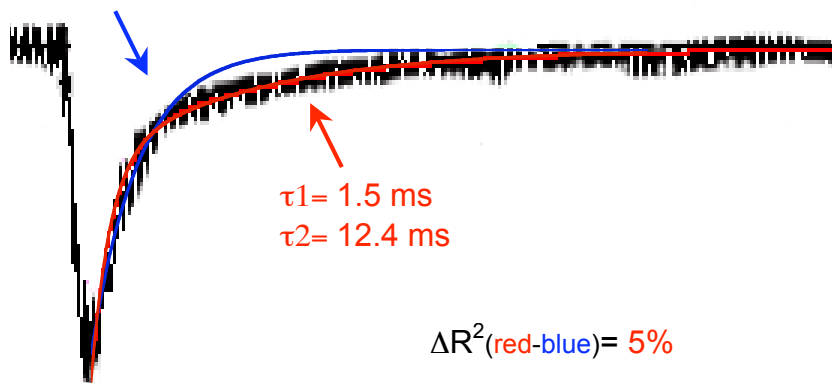

Supplement: pnas_0607450104_2.pdf [file pnas_0607450104_2.pdf]
