# Supplementary material
Source: PubMed Central journal article supplement (PMC1765461)

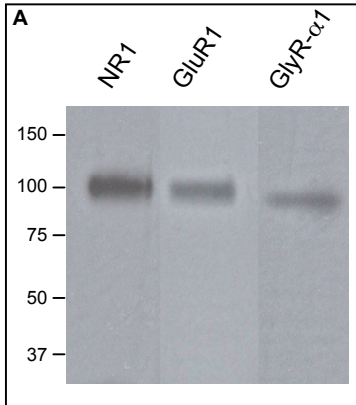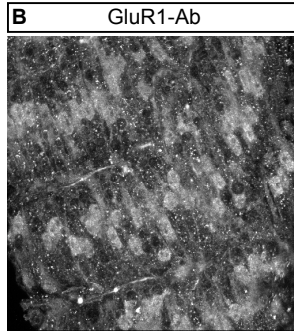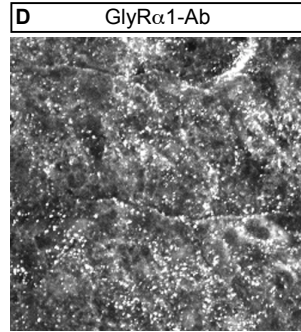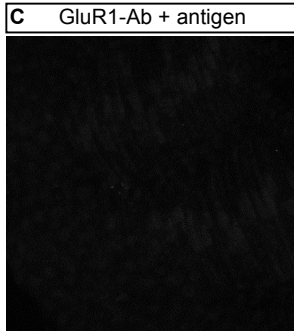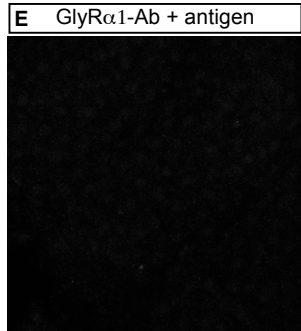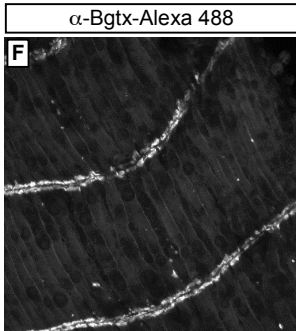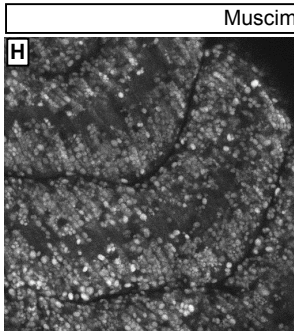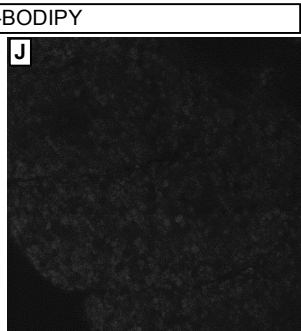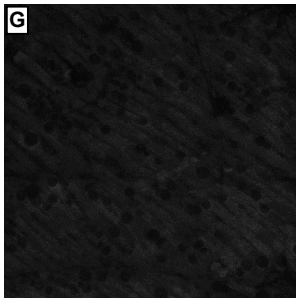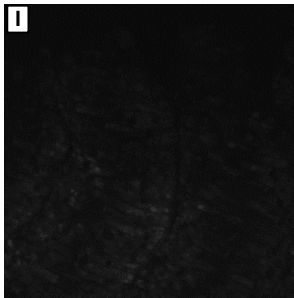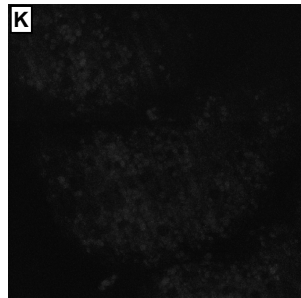

Supplement: pnas_0607450104_1.pdf [file pnas_0607450104_1.pdf]

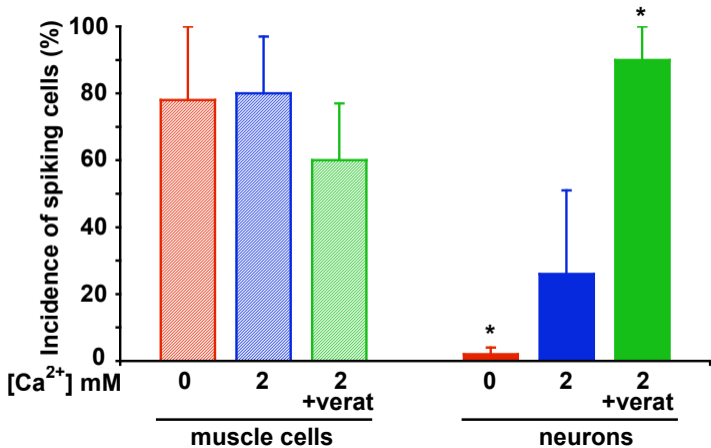

Supplement: pnas_0607450104_3.pdf [file pnas_0607450104_3.pdf]

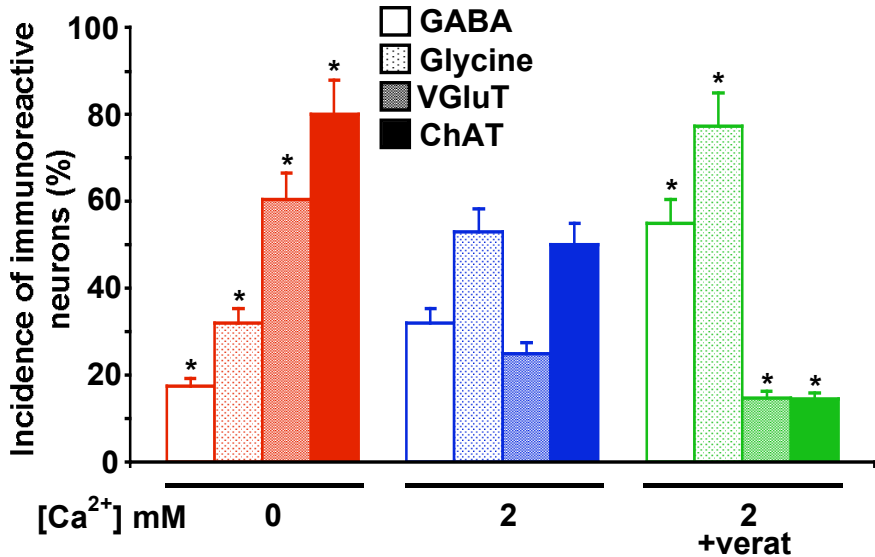

Supplement: pnas_0607450104_4.pdf [file pnas_0607450104_4.pdf]

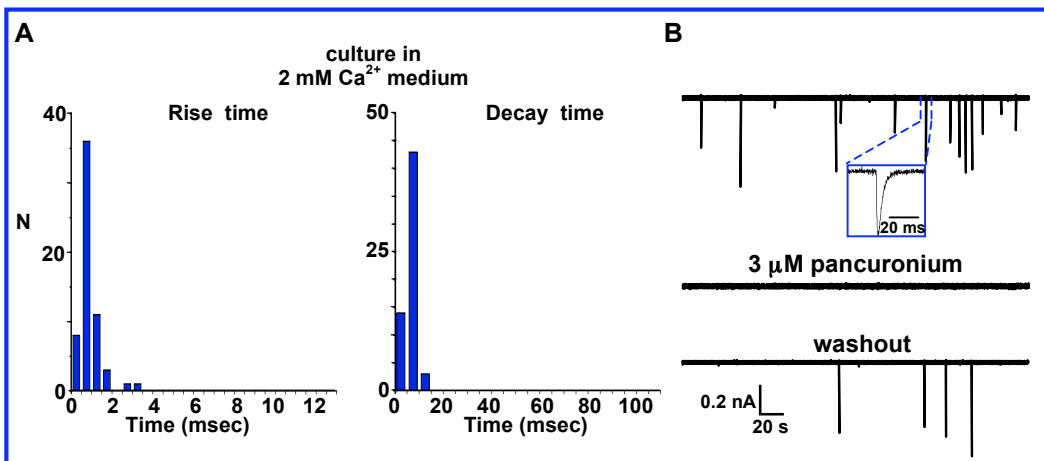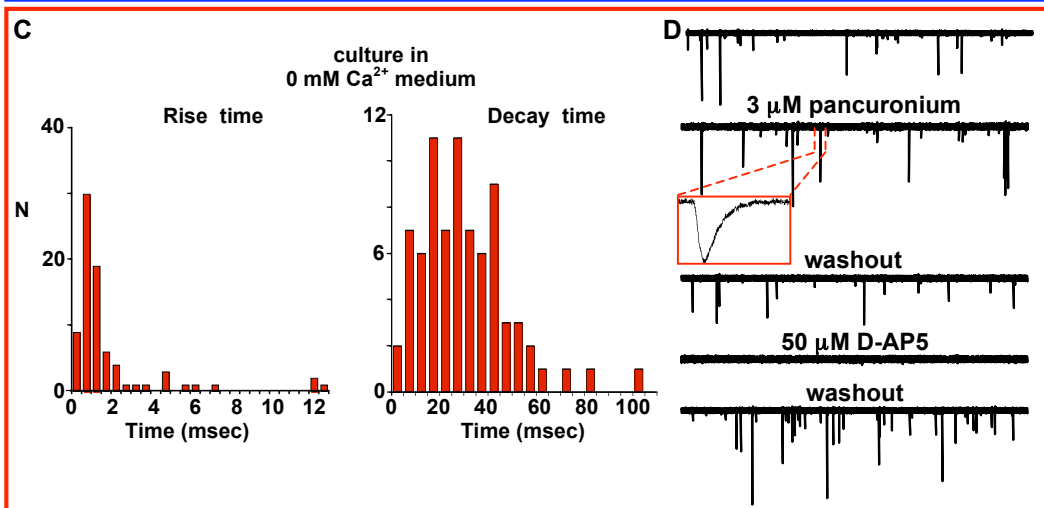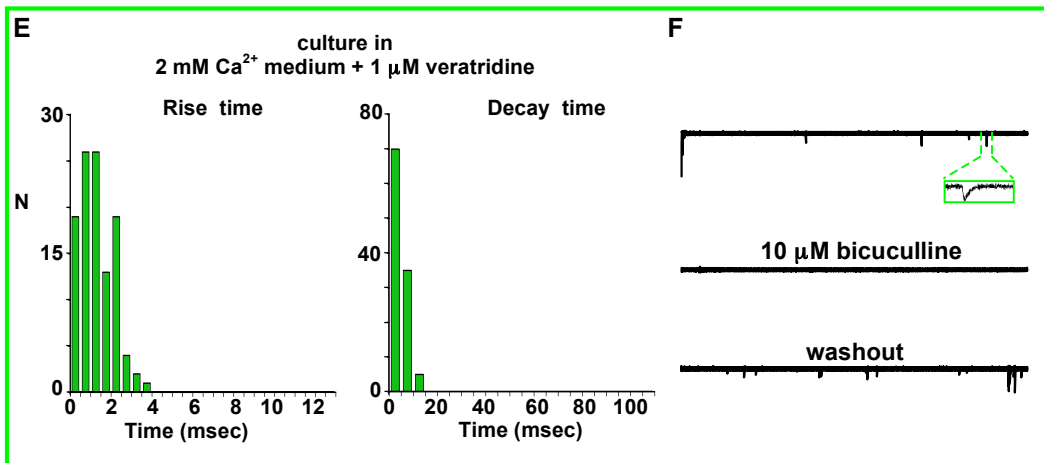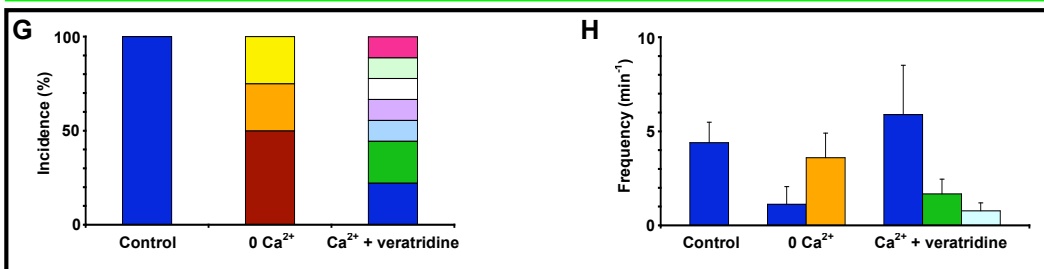

Supplement: pnas_0607450104_5.pdf [file pnas_0607450104_5.pdf]
